# Supplementary material for: Pyruvate Dehydrogenase Kinase 4 Deficiency Increases Tumorigenesis in a Murine Model of Bladder Cancer
Source: MDPI journal article supplement (doi:10.3390/cancers15061654), 2023-03-08
Supplement: s1 [file s1]

# S1

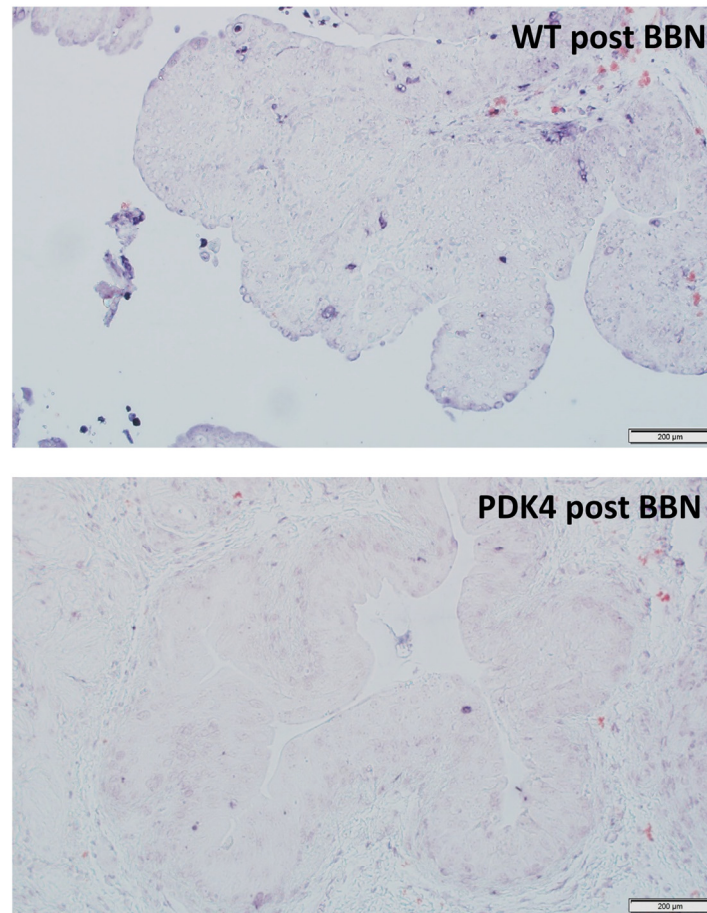

**Supplementary Figure S1: Immunohistology changes in WT and PDK4<sup>-/-</sup> animals.**

Representative TUNEL staining in WT and PDK4<sup>-/-</sup> animals.
